# Supplementary material
Source: ML conference proceedings conference paper supplement (https://openreview.net/forum?id=BrgGA88scgc)

## NAS Approach

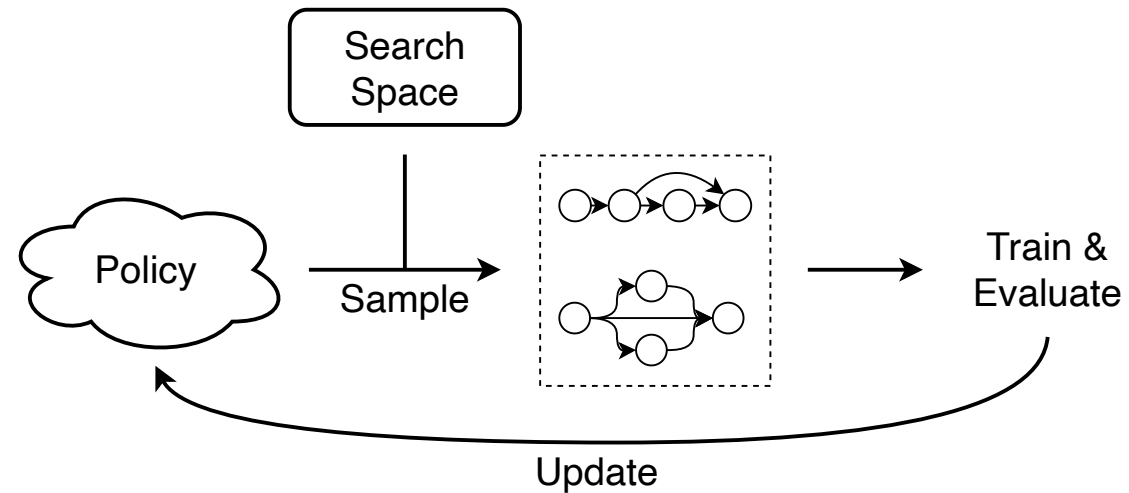

## GNN2GNN Approach

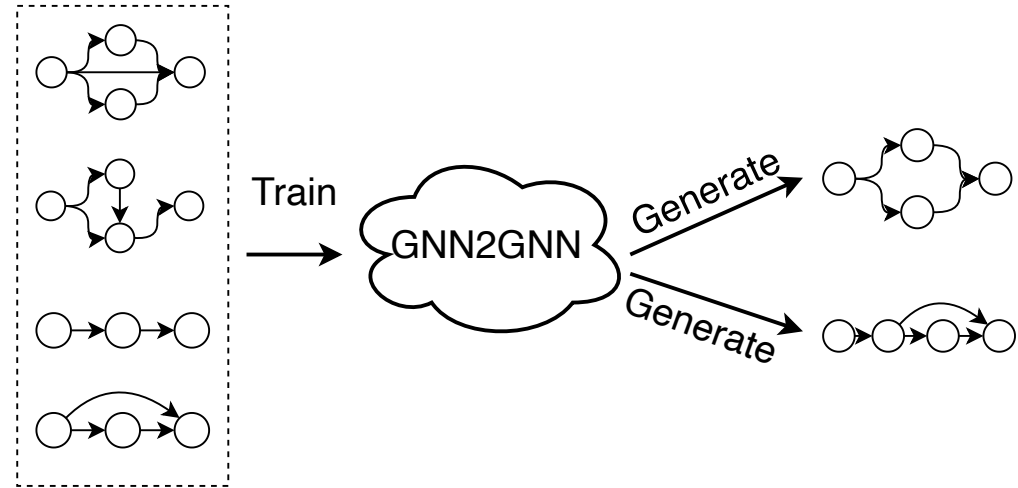

Supplement: supplementary_material [file attachment]

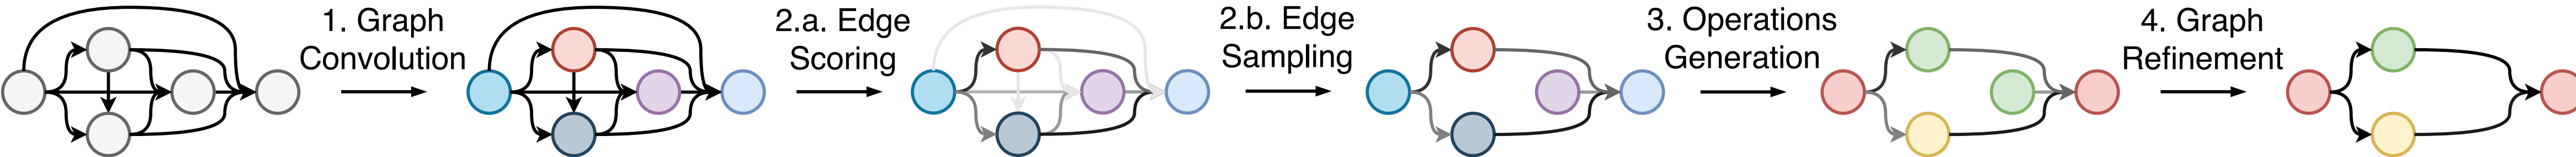

Supplement: supplementary_material [file attachment]

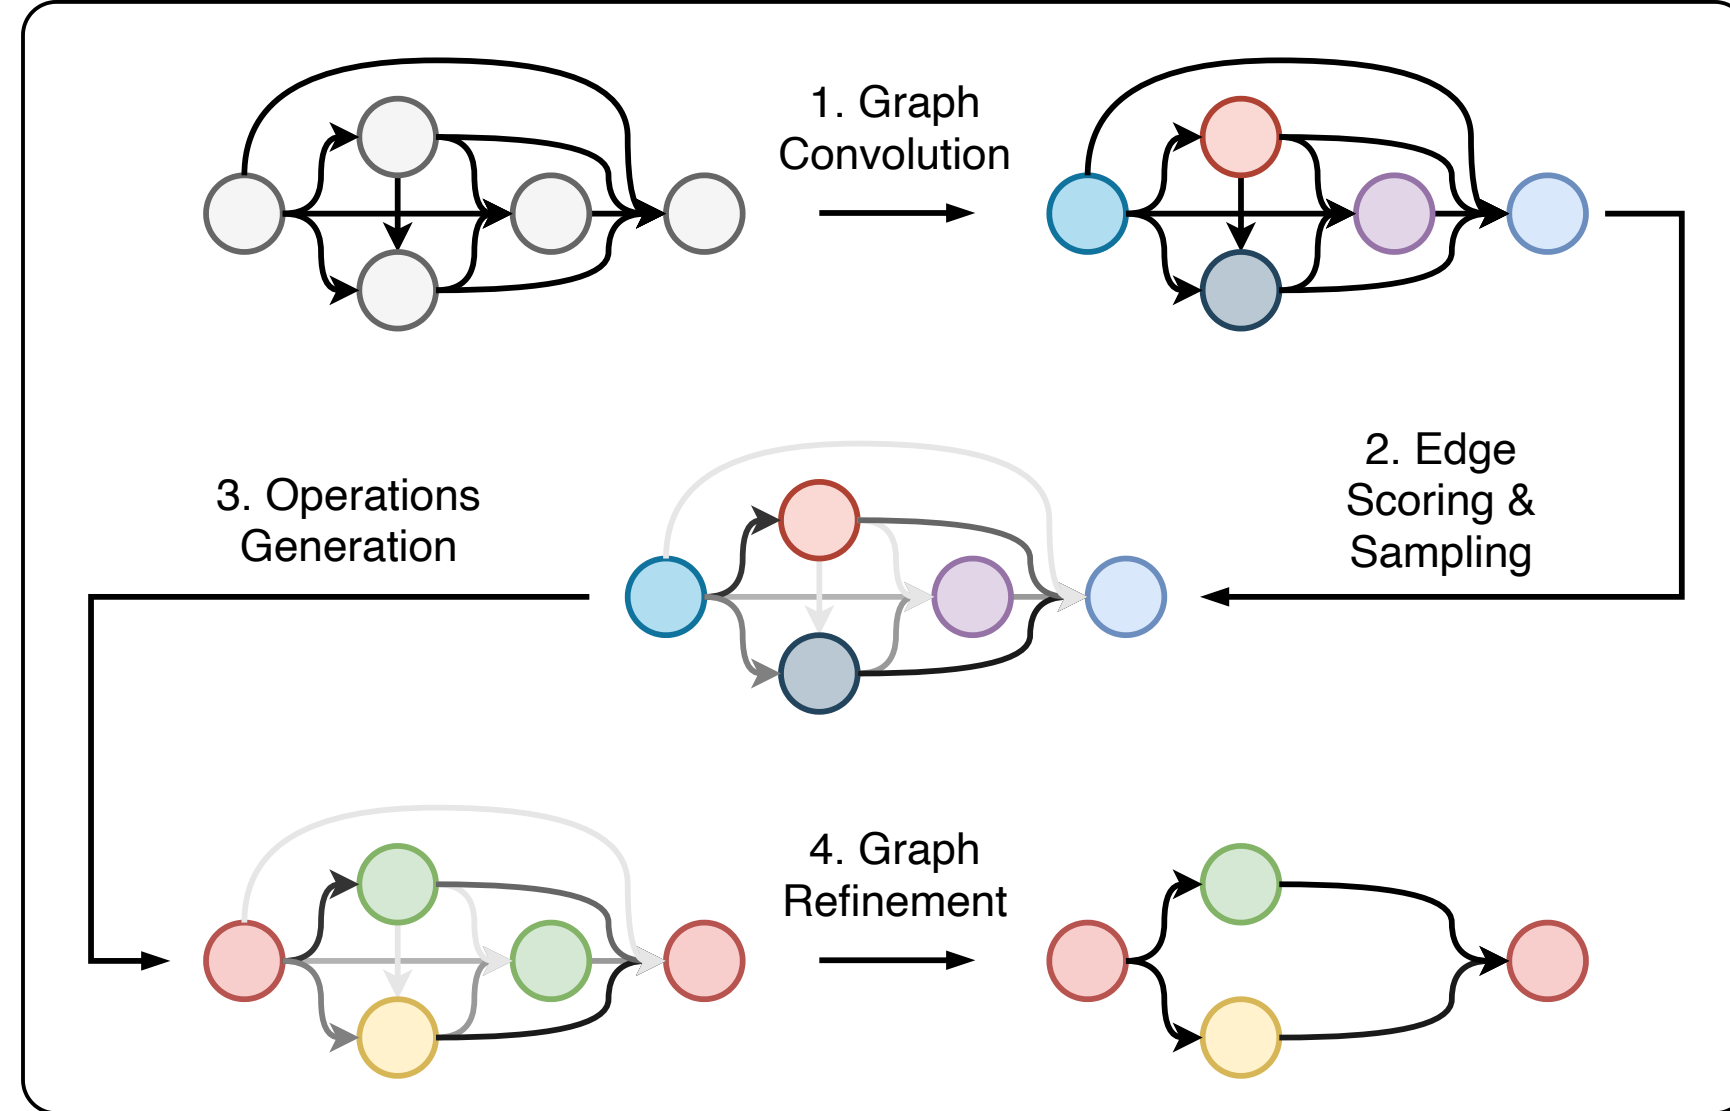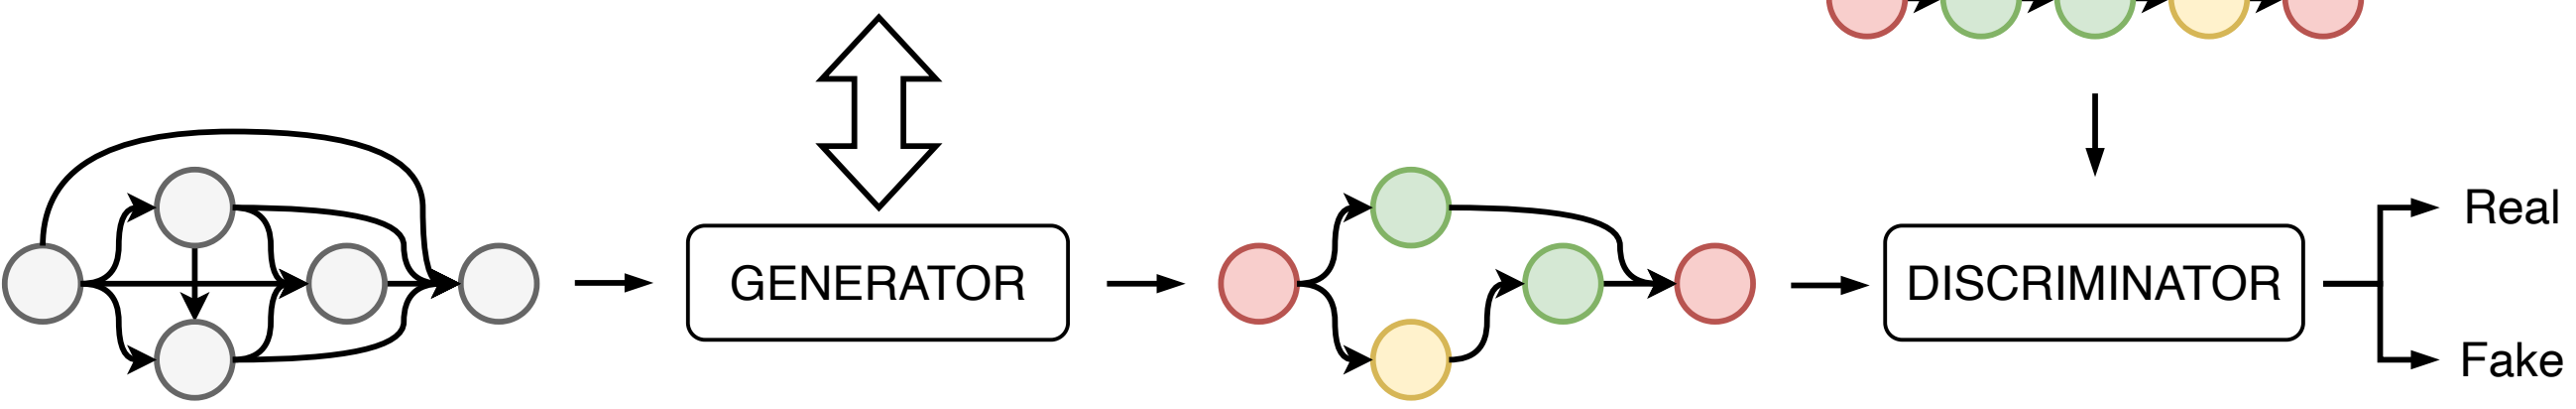

Supplement: supplementary_material [file attachment]

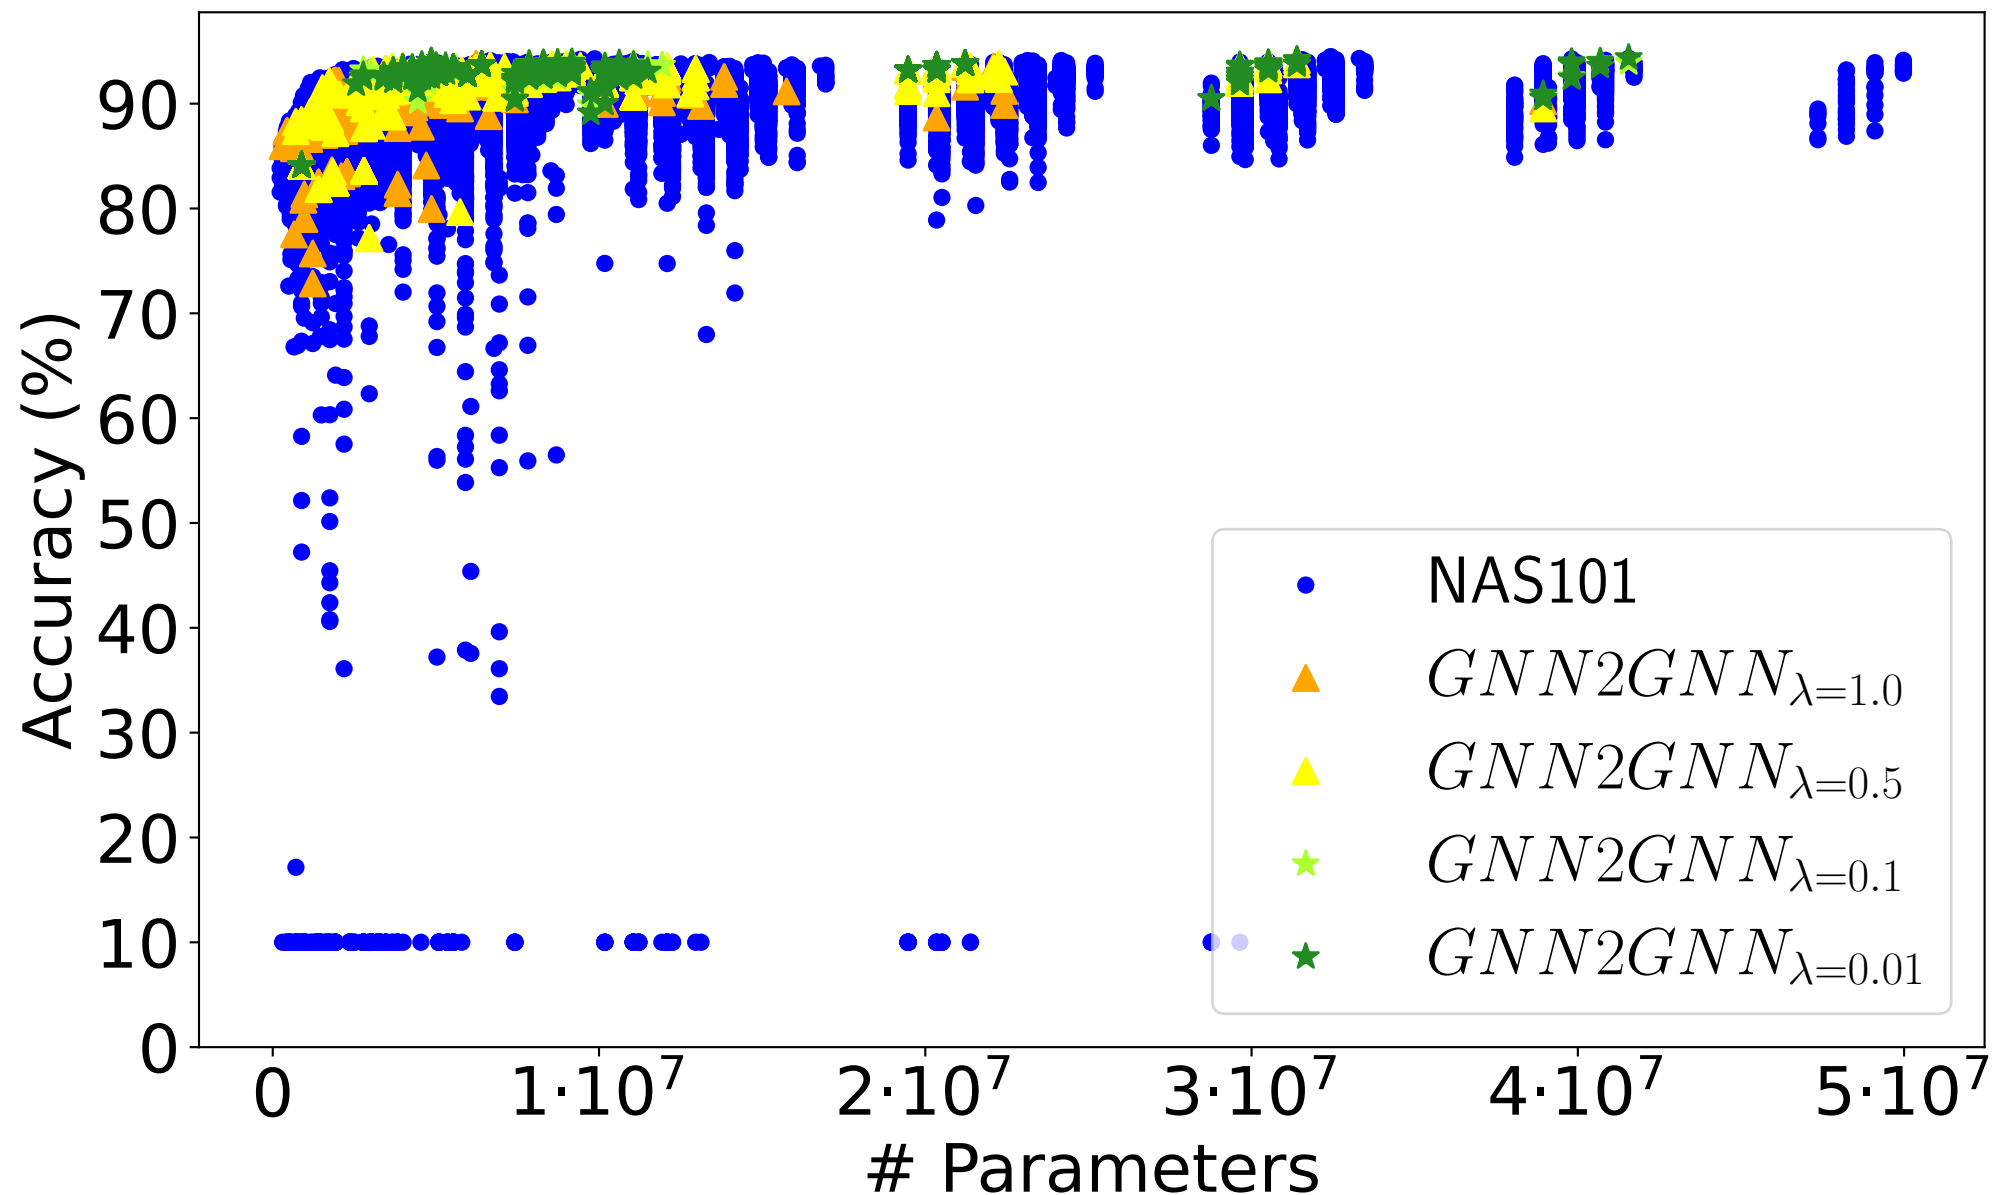

Supplement: supplementary_material [file attachment]

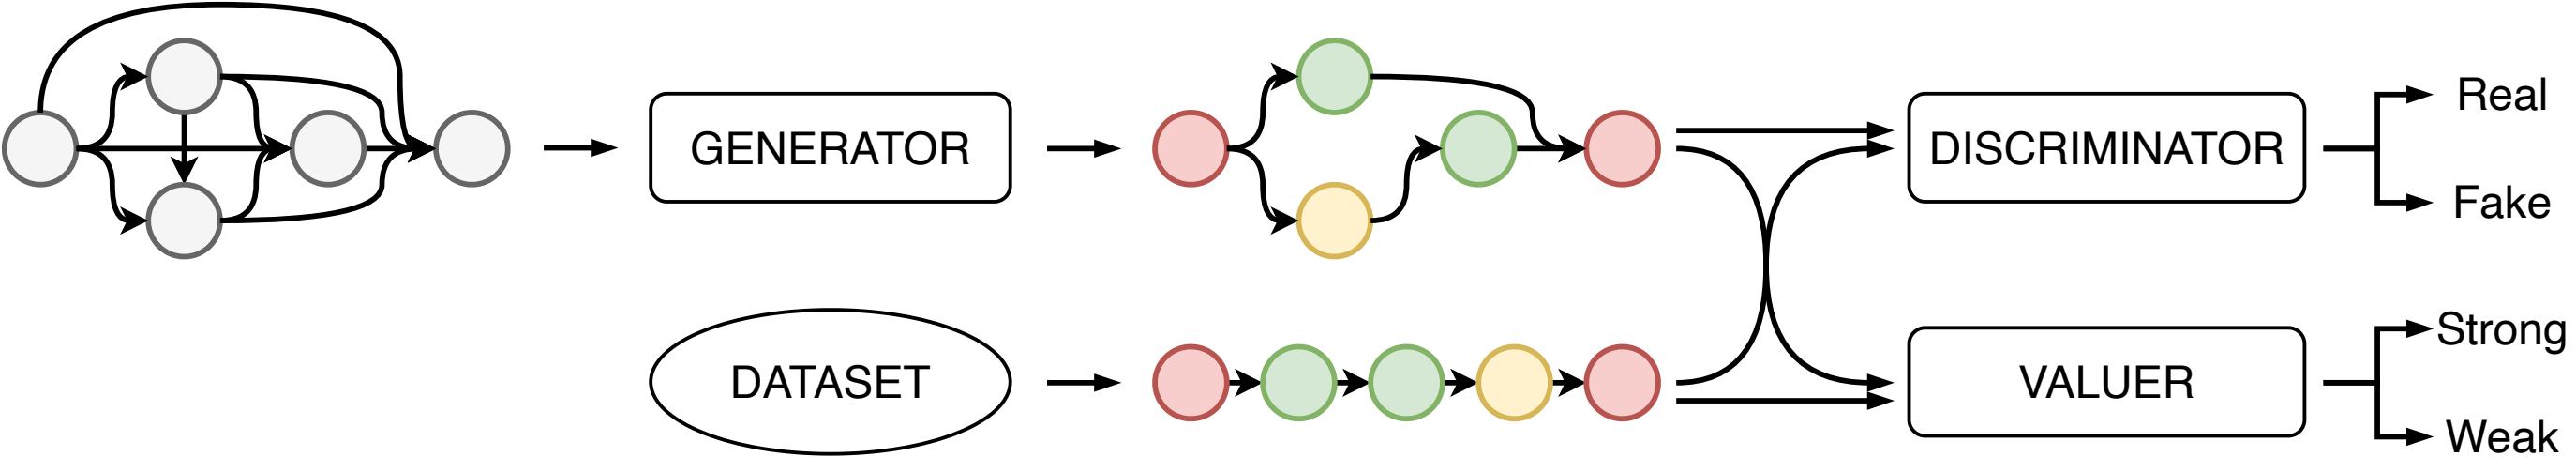

Supplement: supplementary_material [file attachment]

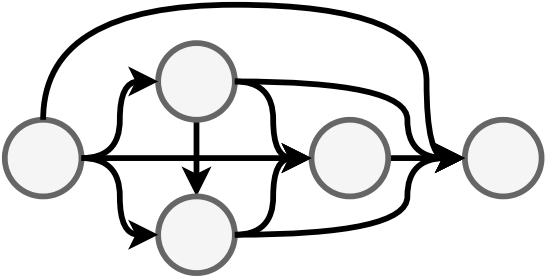

1. Graph  
Convolution  
→

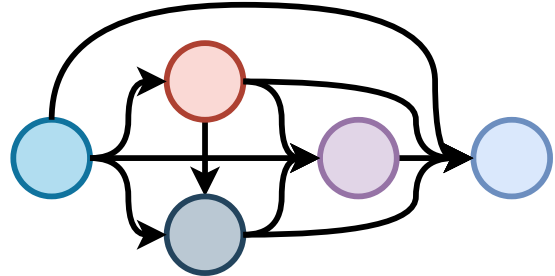

2.a. Edge  
Scoring  
↓

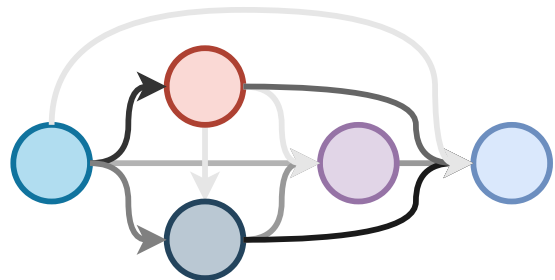

2.b. Edge  
Sampling  
←

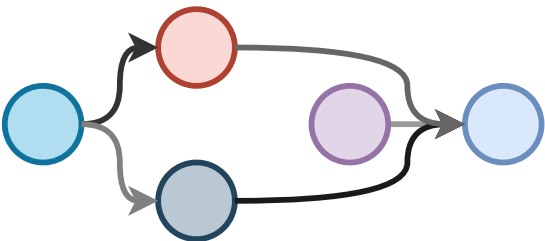

3. Operations  
Generation  
↓

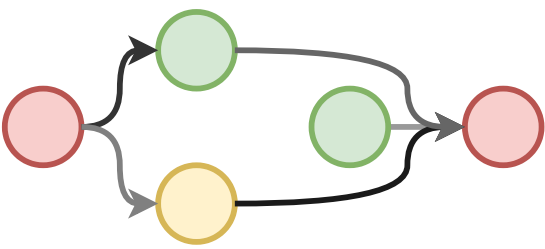

4. Graph  
Refinement  
→

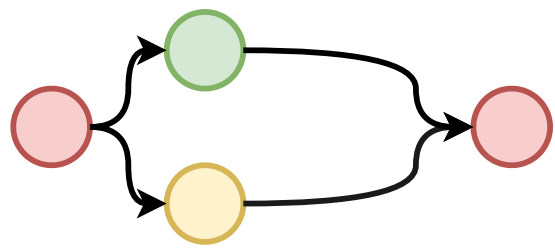

Supplement: supplementary_material [file attachment]

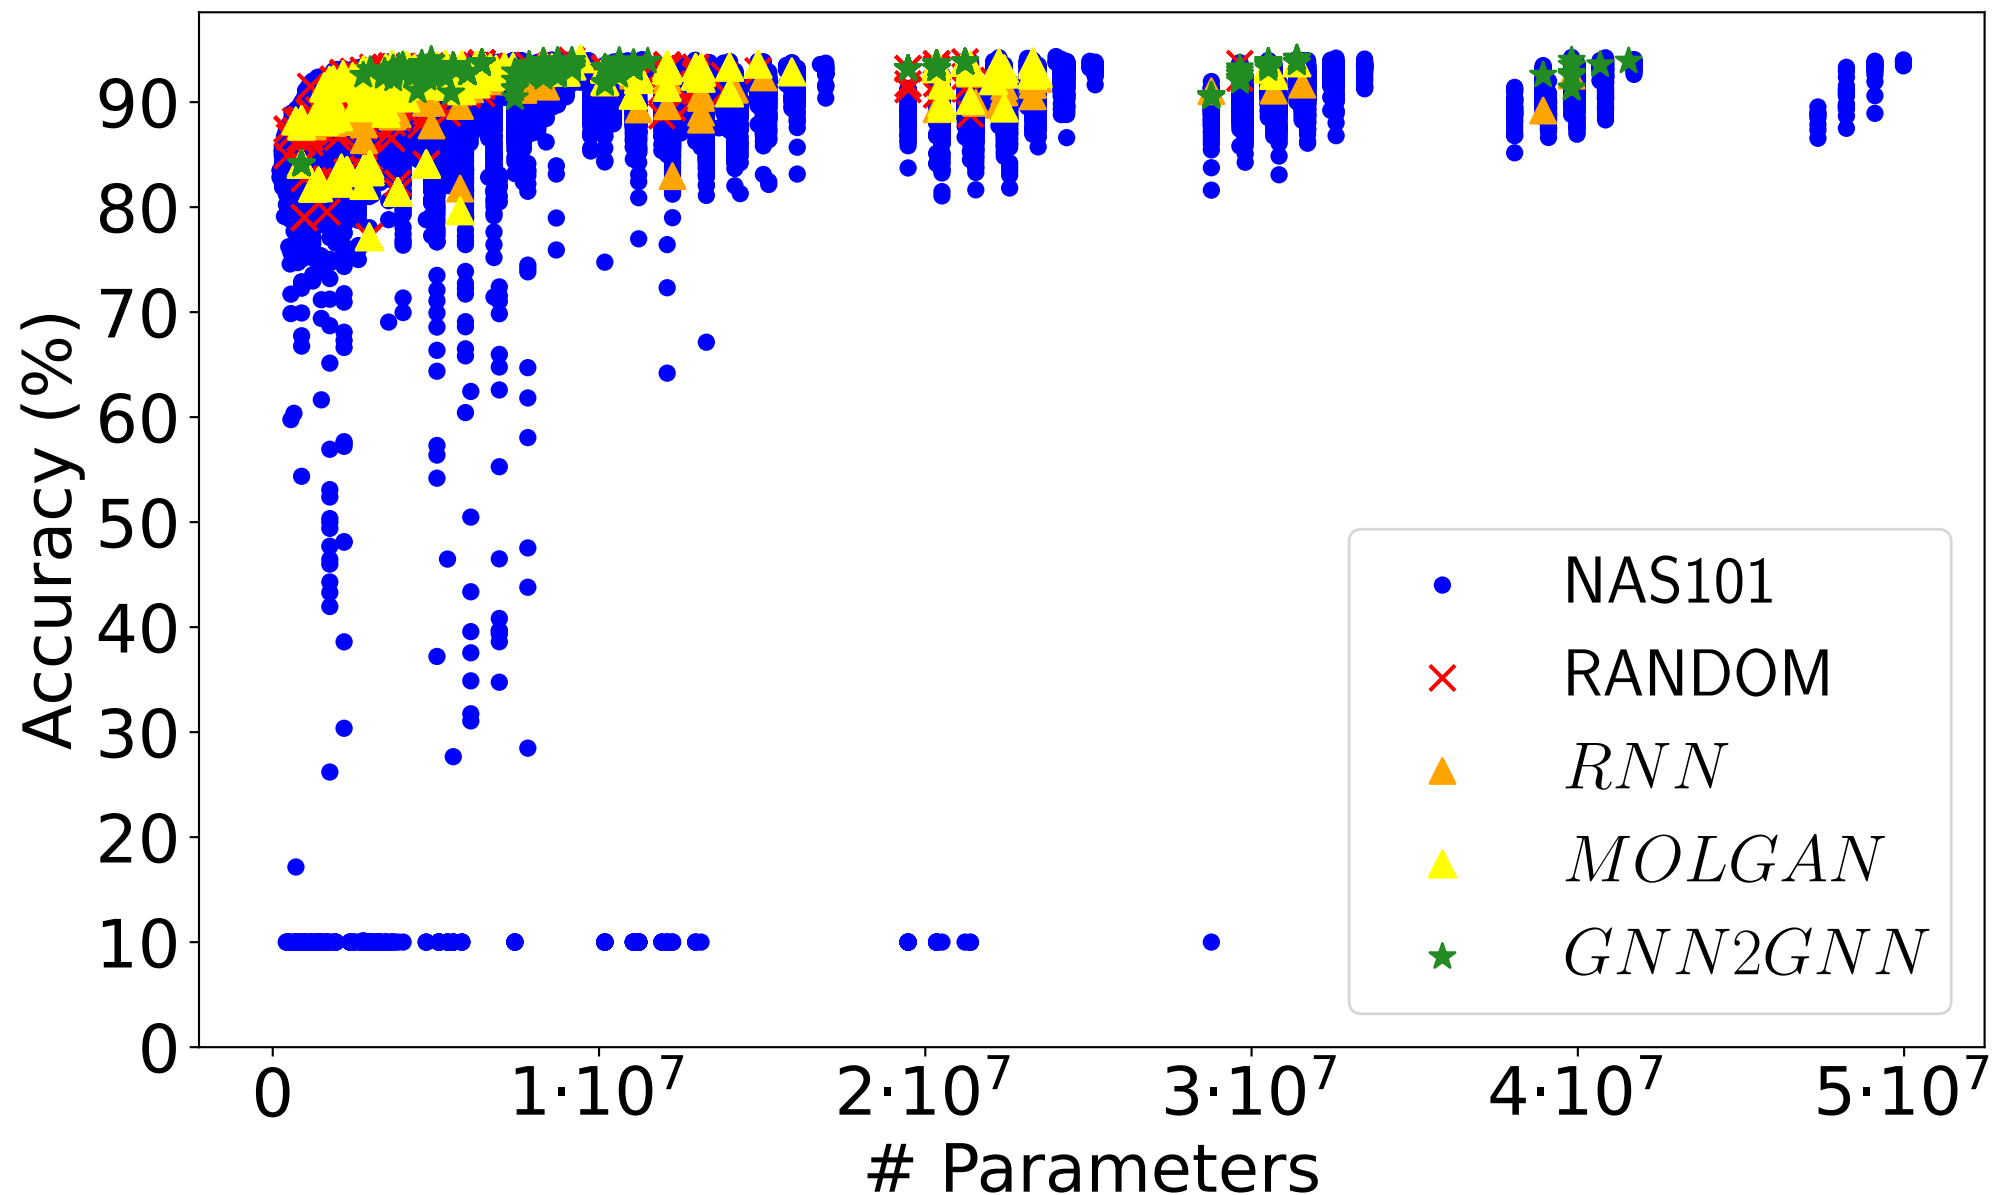

Supplement: supplementary_material [file attachment]

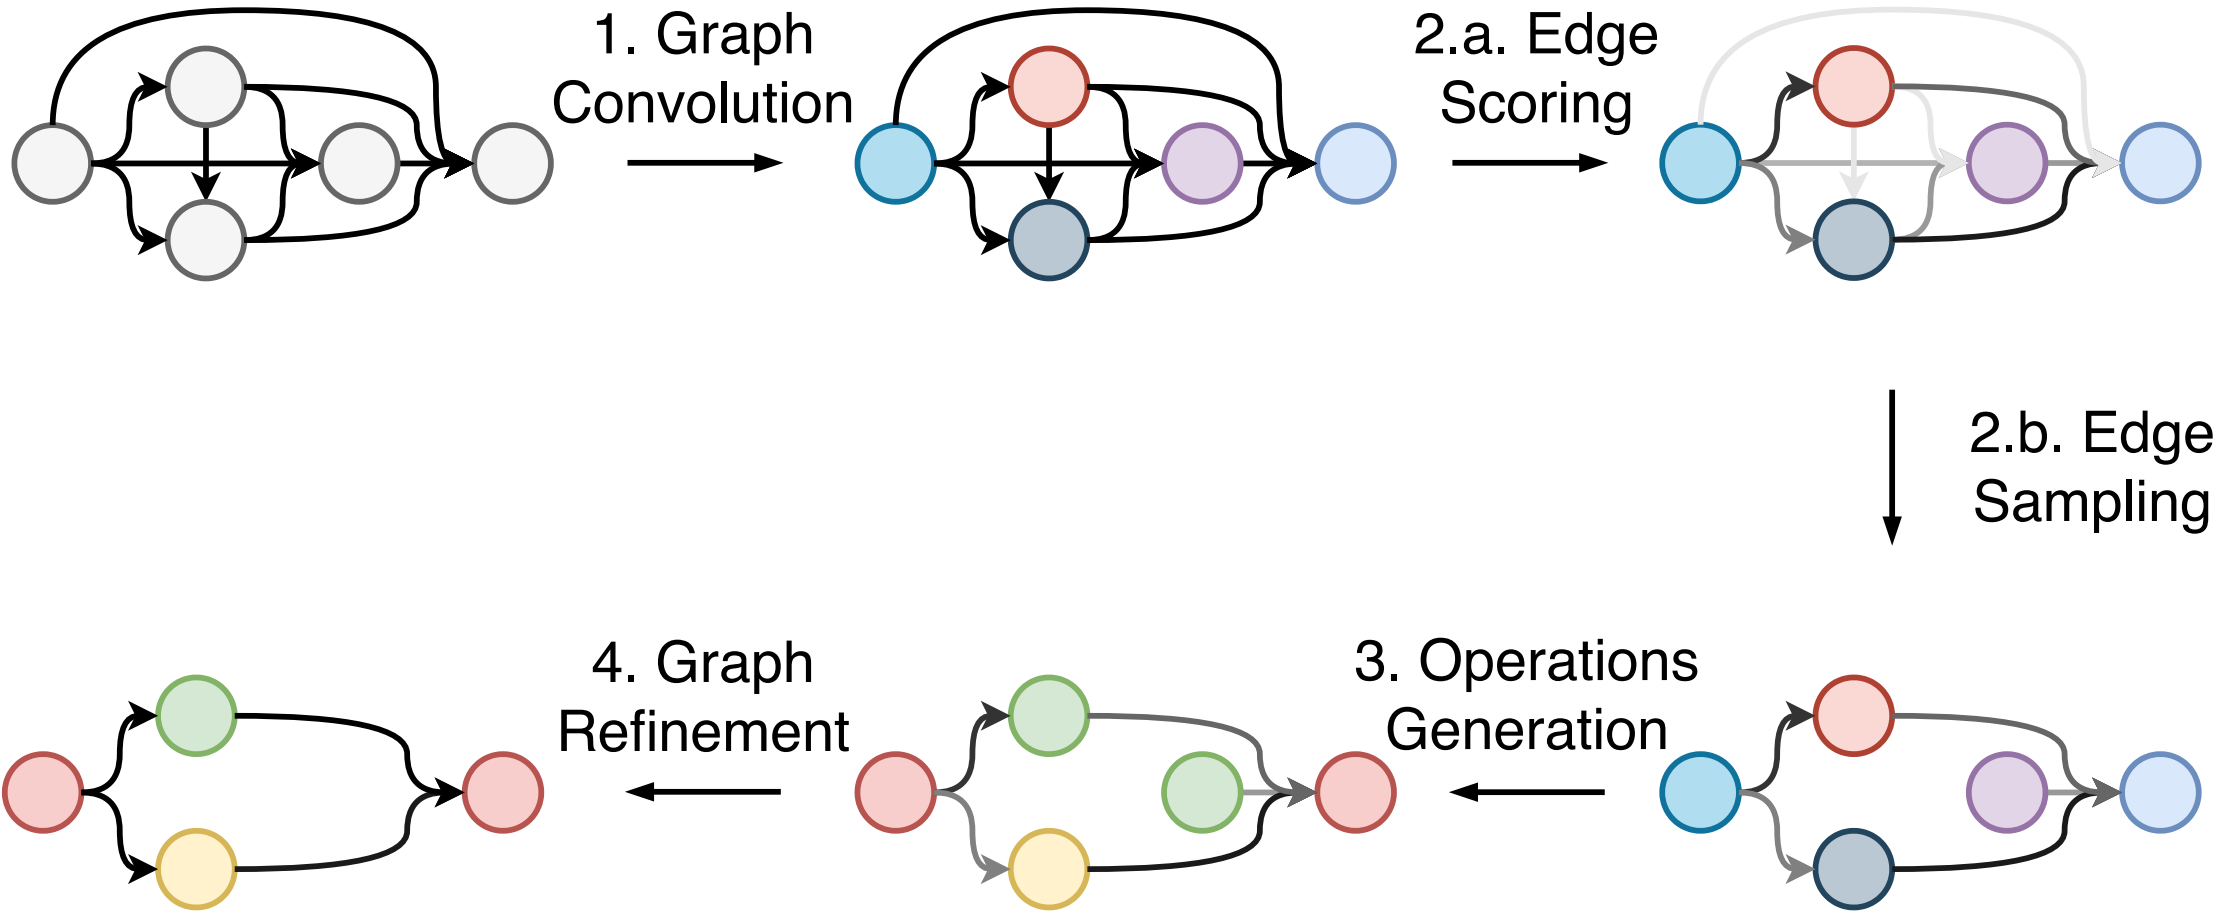

Supplement: supplementary_material [file attachment]
